# Supplementary material for: Induced half-metallic characteristics and enhanced magnetic anisotropy in the two-dimensional Janus V2I3Br3 monolayer by graphyne adsorption
Source: Royal Society of Chemistry journal article supplement (doi:10.1039/d1cp02344f), 2021-01-01
Supplement: d1cp02344f1.pdf [file d1cp02344f1.pdf]

*Electronic Supplementary Information for*

**Induced half-metallic characteristic and enhanced magnetic anisotropy in two-dimensional Janus  $V_2I_3Br_3$  monolayer by adsorbing graphyne**

Nan Sun,<sup>a</sup> Xiaocha Wang,<sup>a,\*</sup> Wenbo Mi<sup>b</sup>

*<sup>a</sup>Tianjin Key Laboratory of Film Electronic & Communicate Devices, School of Electrical and Electronic Engineering, Tianjin University of Technology, Tianjin 300384, China*

*<sup>b</sup>Tianjin Key Laboratory of Low Dimensional Materials Physics and Preparation Technology, School of Science, Tianjin University, Tianjin 300354, China*

---

\* Author to whom all correspondence should be addressed.

E-mail: [wangxc@email.tjut.edu.cn](mailto:wangxc@email.tjut.edu.cn)

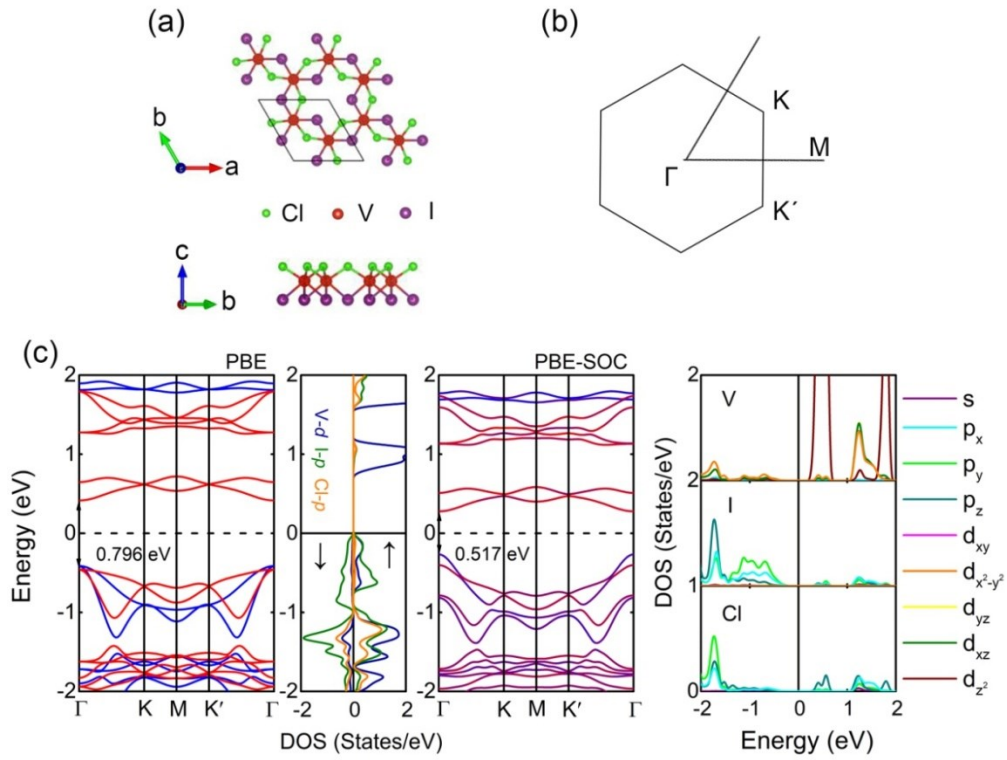

**Fig. S1** (a) Crystal structure of Janus  $V_2I_3Cl_3$  monolayer from the top and side views. (b) Hexagonal Brillouin zone. (c) Calculated band structure and PDOS of Janus  $V_2I_3Cl_3$  monolayer. Red and blue lines represent the spin-up and spin-down channels. Fermi level is set to zero.

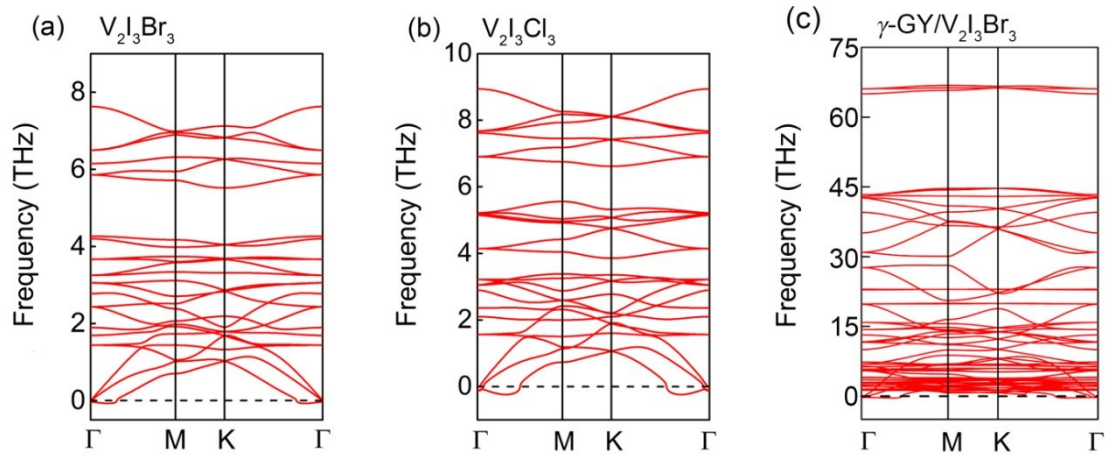

**Fig. S2** Phonon spectrum of the Janus (a)  $V_2I_3Br_3$ , (b)  $V_2I_3Cl_3$  monolayers and (c) the most stable  $\gamma$ -GY/ $V_2I_3Br_3$  heterostructure.

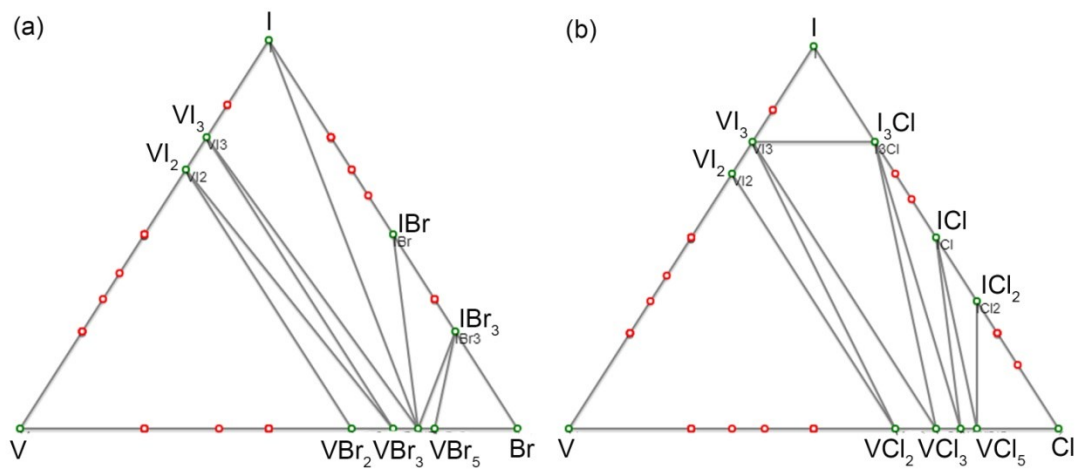

**Fig. S3** Calculated phase diagrams of (a) Janus  $V_2I_3Br_3$  and (b)  $V_3I_3Cl_3$  monolayers.

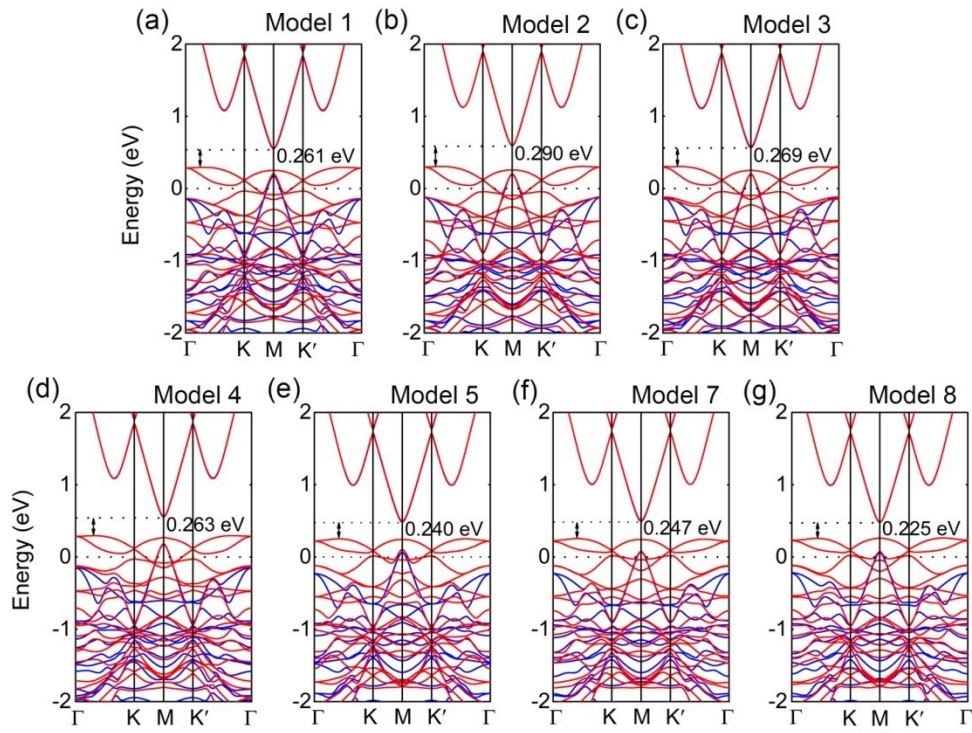

**Fig. S4** (a)-(g) Band structure for  $\gamma$ -GY/ $V_2I_3Br_3$  heterostructures of model 1-5 and model 7-8. Red and blue lines represent the spin-up and spin-down channels. Fermi level is set to zero.

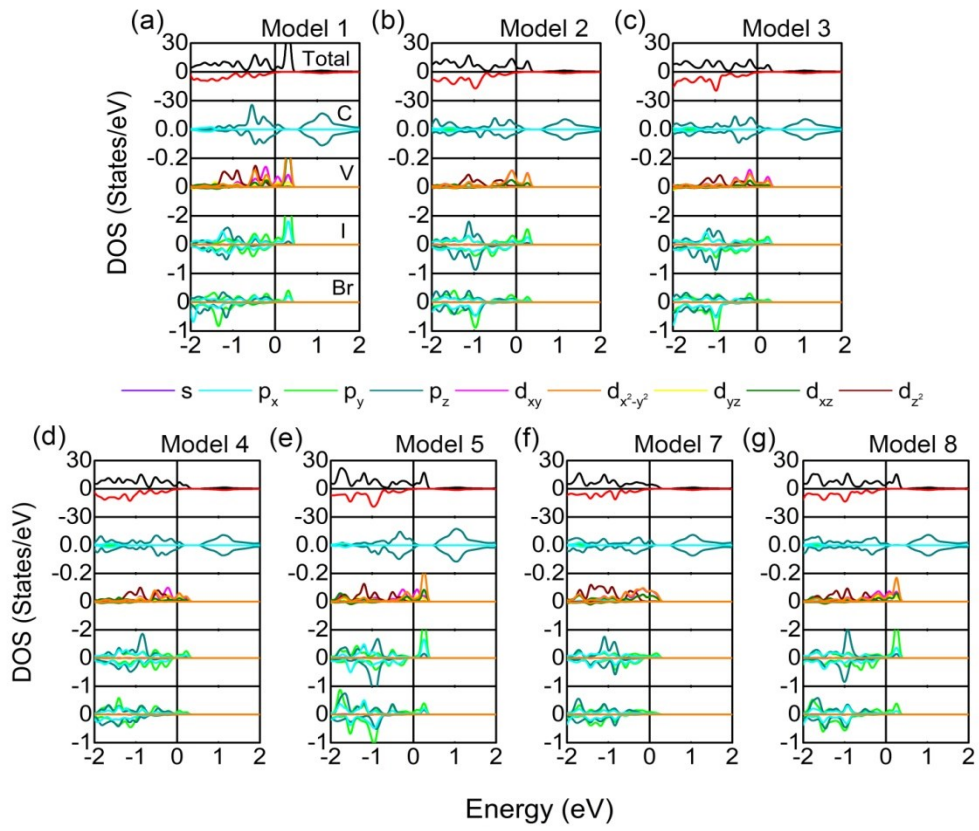

**Fig. S5** (a)-(g) Spin-resolved total DOS and PDOS for  $\gamma$ -GY/ $V_2I_3Br_3$  heterostructures of model 1-5 and model 7-

8.

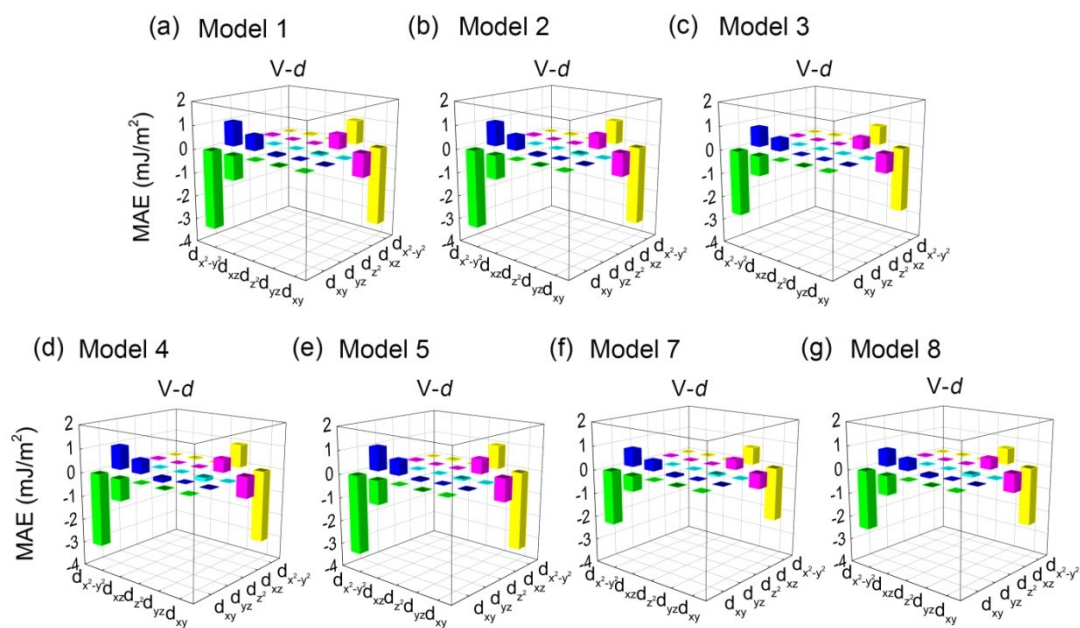

**Fig. S6** (a)-(g) V-d orbital-resolved MAE in model 1-5 and model 7-8. The negative MAE from hybridization between V-d orbitals represents PMA.

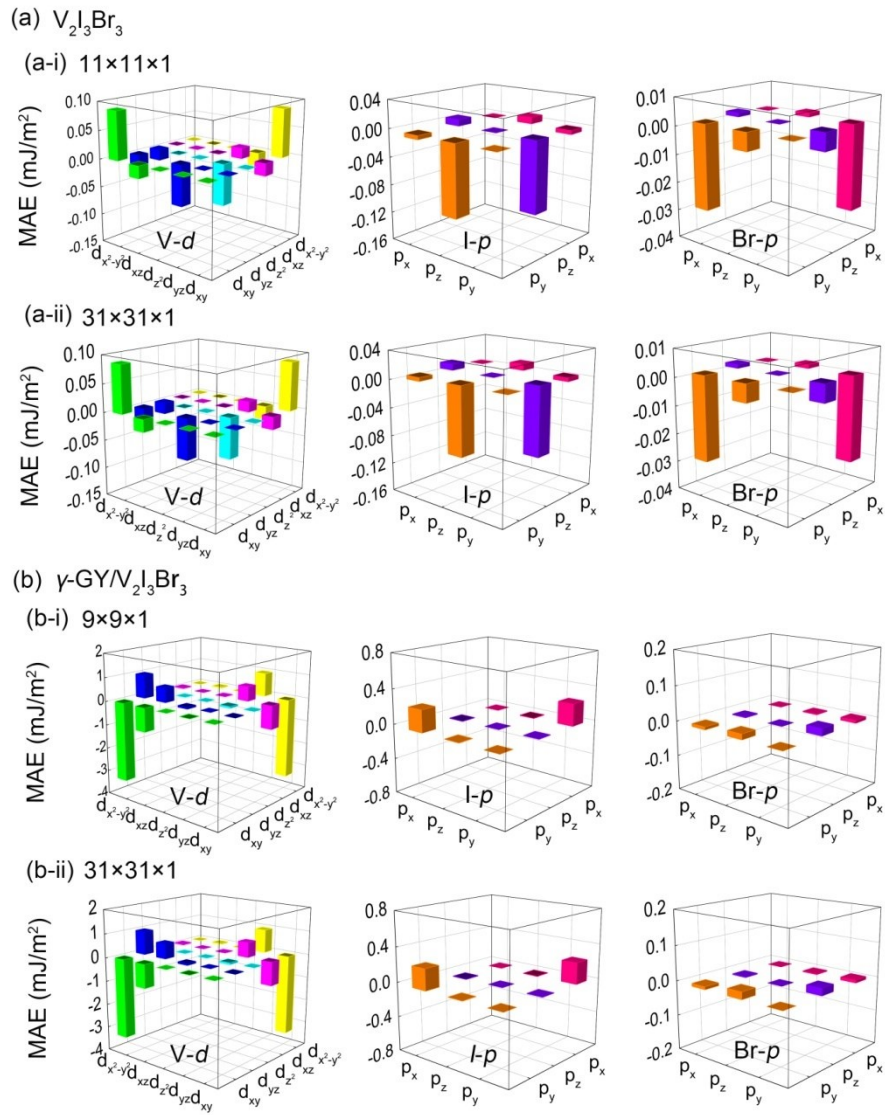

**Fig. S7** Orbital-resolved MAE of V- $d$ , I- $p$  and Br- $p$  orbitals in Janus  $V_2I_3Br_3$  monolayer and  $\gamma$ -GY/ $V_2I_3Br_3$  heterostructure at different k-point meshes.
